# Supplementary material for: High Blood Pressure and Long-Term Exposure to Indoor Noise and Air Pollution from Road Traffic
Source: PubMed Central journal article supplement (PMC4216159; doi:10.1289/ehp.1307156), 2014-07-08
Supplement: ehp.1307156.s001.508.pdf [file ehp.1307156.s001.508.pdf]

## **Supplemental Material**

### **High Blood Pressure and Long-Term Exposure to Indoor Noise and Air Pollution from Road Traffic**

Maria Foraster, Nino Künzli, Inmaculada Aguilera, Marcela Rivera, David Agis, Joan Vila,  
Laura Bouso, Alexandre Deltell, Jaume Marrugat, Rafel Ramos, Jordi Sunyer, Roberto  
Elosua, and Xavier Basagaña

| <b>Table of Contents</b> | <b>Page</b> |
|--------------------------|-------------|
| <b>Table S1</b>          | <b>2</b>    |
| <b>Table S2</b>          | <b>3</b>    |
| <b>Table S3</b>          | <b>4</b>    |
| <b>Table S4</b>          | <b>5</b>    |
| <b>Figure S1</b>         | <b>6</b>    |
| <b>Figure S2</b>         | <b>7</b>    |

**Table S1.** Extension of Table 1 on the main characteristics of the study sample (n = 1926).

| Characteristic                                           | Total<br>(n=1926) | Non-hypertensive<br>(n=1222) | Hypertensive<br>(n=704) | p-value <sup>a</sup> |
|----------------------------------------------------------|-------------------|------------------------------|-------------------------|----------------------|
| <b>Continuous variables [median (IQR)]</b>               |                   |                              |                         |                      |
| Outdoor railway noise levels, L <sub>night</sub> [dB(A)] | 41.8 (15.2)       | 41.5 (16.0)                  | 42.1 (14.2)             | 0.558                |
| Daily mean temperature at lag 0 (°C)                     | 13.8 (12.9)       | 13.9 (13.1)                  | 13.6 (12.7)             | 0.589                |
| <b>Categorical variables [n (%)]</b>                     |                   |                              |                         |                      |
| Daily alcohol intake (g/l)                               |                   |                              |                         |                      |
| No alcohol                                               | 441 (22.9)        | 282 (23.1)                   | 159 (22.6)              | 0.033                |
| Little (≤ 20)                                            | 1227 (63.7)       | 796 (65.1)                   | 431 (61.2)              |                      |
| Moderate (20.1-39.9)                                     | 198 (10.3)        | 114 (9.30)                   | 84 (11.9)               |                      |
| Excessive (≥ 40)                                         | 60 (3.10)         | 30 (2.50)                    | 30 (4.30)               |                      |
| Weekly physical activity (MET)                           |                   |                              |                         |                      |
| Tertile 1                                                | 630 (32.7)        | 399 (32.7)                   | 231 (32.8)              | 0.655                |
| Tertile 2                                                | 641 (33.3)        | 415 (34.0)                   | 226 (32.1)              |                      |
| Tertile 3                                                | 655 (34.0)        | 408 (33.4)                   | 247 (35.1)              |                      |
| Hearing loss, no                                         |                   |                              |                         |                      |
| Mild                                                     | 481 (26.6)        | 289 (25.3)                   | 192 (28.8)              | 0.221                |
| Severe                                                   | 139 (7.70)        | 61 (5.30)                    | 78 (11.7)               |                      |
| Living alone, yes                                        |                   |                              |                         |                      |
| Season of re-examination, winter                         | 200 (10.4)        | 119 (9.70)                   | 81 (11.5)               | 0.221                |
| Spring                                                   | 372 (19.3)        | 230 (18.8)                   | 142 (20.2)              | < 0.001              |
| Summer                                                   | 562 (29.2)        | 321 (26.3)                   | 241 (34.2)              |                      |
| Autumn                                                   | 426 (22.1)        | 305 (25.0)                   | 121 (17.2)              |                      |
|                                                          | 566 (29.4)        | 366 (30.0)                   | 200 (28.4)              |                      |

L<sub>night</sub>: Long-term average nighttime noise level; MET: Metabolic equivalents.

<sup>a</sup> $\chi^2$  test and Kruskal-Wallis test for strata of hypertension with categorical or continuous variables, respectively.

**Table S2.** Estimated change in the prevalence of hypertension [odds ratios (95% CI)] and in systolic (SBP) and diastolic (DBP) blood pressure (mmHg) [beta coefficients (95% CI), in mmHg] per 5 dB(A) increase of indoor traffic noise at night ( $L_{\text{night}}$ ) and per  $10 \mu\text{g}/\text{m}^3$  increase of annual average levels of outdoor nitrogen dioxide ( $\text{NO}_2$ ) applying a linear threshold model for indoor noise at 30 dB(A), ( $n = 1926$ ).

| <b>Multi-exposure model</b>       | <b>Hypertension</b> | <b>SBP</b>          | <b>DBP</b>          |
|-----------------------------------|---------------------|---------------------|---------------------|
| Indoor traffic $L_{\text{night}}$ | 1.14 (0.99, 1.31)*  | 1.27 (0.34, 2.20)** | 0.17 (-0.36, 0.71)  |
| $\text{NO}_2$                     | 1.17 (1.00, 1.37)*  | 1.25 (0.23, 2.27)** | 0.56 (-0.03, 1.15)* |

Model adjusted for indoor traffic  $L_{\text{night}}$ , annual average  $\text{NO}_2$ , age, age squared, sex, education, Mediterranean diet, exercise, alcohol consumption, smoking, BMI, diabetes, deprivation, daily temperature, BP-lowering medication, and indoor railway  $L_{\text{night}}$ .

\*\*  $p < 0.05$ , \*  $p < 0.1$

**Table S3.** Estimated change in the prevalence of hypertension per increment of 5dB(A) in annual average levels of indoor traffic noise at night ( $L_{\text{night}}$ ) by subgroups of population characteristics. A subset of the main results in this table is graphically shown in Figure 1.

| Interaction term                   | N    | Odds ratio (95% CI) <sup>a</sup> | p-value interaction |
|------------------------------------|------|----------------------------------|---------------------|
| Age, < 50                          | 591  | 1.13 (1.00, 1.28)                | 0.540 <sup>b</sup>  |
| 50-59                              | 594  | 1.03 (0.94, 1.13)                |                     |
| 60-69                              | 421  | 1.08 (0.98, 1.19)                |                     |
| > 69                               | 320  | 1.03 (0.92, 1.16)                |                     |
| Gender, male                       | 879  | 1.09 (1.00, 1.18)                | 0.315               |
| female                             | 1050 | 1.04 (0.96, 1.12)                |                     |
| Traffic annoyance, no              | 1198 | 1.02 (0.95, 1.10)                | 0.141 <sup>c</sup>  |
| Moderate (1-5)                     | 549  | 1.12 (1.00, 1.25)                |                     |
| High (6-10)                        | 168  | 1.18 (0.97, 1.43)                |                     |
| Low noise sensitivity, < P50       | 908  | 1.08 (1.00, 1.17)                | 0.498               |
| High noise sensitivity, $\geq$ P50 | 810  | 1.04 (0.96, 1.14)                |                     |
| Anxiolytics, no                    | 1492 | 1.10 (1.02, 1.18)                | 0.054               |
| Yes                                | 425  | 0.99 (0.89, 1.09)                |                     |
| Educational level                  |      |                                  |                     |
| University or similar              | 596  | 1.06 (0.96, 1.18)                | 0.454               |
| Secondary                          | 618  | 1.12 (1.01, 1.25)                |                     |
| Primary                            | 681  | 1.03 (0.95, 1.12)                |                     |
| Illiterate                         | 31   | 1.18 (0.84, 1.68)                |                     |
| Diabetes, no                       | 1665 | 1.07 (0.99, 1.14)                | 0.798               |
| Yes                                | 261  | 1.05 (0.93, 1.19)                |                     |
| Body mass index, < 20              | 68   | 0.86 (0.59, 1.25)                | 0.591               |
| 20-25                              | 605  | 1.04 (0.94, 1.15)                |                     |
| 25.1-30                            | 851  | 1.08 (1.00, 1.18)                |                     |
| >30                                | 402  | 1.05 (0.94, 1.17)                | 0.559               |
| Hearing loss, no                   | 1188 | 1.08 (0.99, 1.17)                |                     |
| Mild                               | 481  | 1.04 (0.96, 1.15)                |                     |
| Severe                             | 139  | 1.16 (0.97, 1.39)                |                     |

<sup>a</sup>Each multivariate logistic regression model is adjusted for the corresponding interaction-term, one at a time, and annual average NO<sub>2</sub> levels, age, age squared, sex, education, Mediterranean diet, exercise, alcohol consumption, smoking, BMI, diabetes, deprivation, daily temperature, and indoor railway  $L_{\text{night}}$  levels. <sup>b</sup>p-value for trend = 0.381 and p-value of interaction for the continuous variable = 0.386. <sup>c</sup>p-value for trend = 0.052 and p-value of interaction for the continuous variable = 0.033.

**Table S4.** Estimated change in systolic (SBP) and diastolic (DBP) blood pressure [beta coefficients (95% CI), in mmHg] per increments<sup>a</sup> of indoor traffic noise at night ( $L_{\text{night}}$ ) and annual average levels of nitrogen dioxide ( $\text{NO}_2$ ) using different methods to control for BP-lowering medication.

| <b>Multi-exposure models<sup>b</sup></b>  | <b>n</b> | <b>SBP, <math>L_{\text{night}}</math></b> | <b>SBP, <math>\text{NO}_2</math></b> | <b>DBP, <math>L_{\text{night}}</math></b> | <b>DBP, <math>\text{NO}_2</math></b> |
|-------------------------------------------|----------|-------------------------------------------|--------------------------------------|-------------------------------------------|--------------------------------------|
| Non-medicated <sup>c</sup>                | 1462     | 0.38 (-0.08, 0.83)                        | 1.10 (0.03, 2.18)**                  | -0.06 (-0.33, 0.22)                       | 0.59 (-0.06, 1.24)*                  |
| Medicated <sup>c</sup>                    | 464      | 1.64 (0.57, 2.70)**                       | 1.59 (-1.02, 4.20)                   | 0.60 (0.04, 1.15)**                       | -0.01 (-1.37, 1.35)                  |
| Not adjusting for medication <sup>d</sup> | 1926     | 0.75 (0.32, 1.18)**                       | 1.27 (0.23, 2.30)**                  | 0.12 (-0.14, 0.37)                        | 0.58 (-0.02, 1.18)*                  |
| Adjusting for medication <sup>e</sup>     | 1926     | 0.72 (0.29, 1.15)**                       | 1.23 (0.21, 2.25)**                  | 0.10 (-0.15, 0.34)                        | 0.56 (-0.03, 1.14)*                  |
| SBP + 10 mmHg <sup>f</sup>                | 1926     | 0.79 (0.33, 1.25)**                       | 1.32 (0.22, 2.42)**                  | -                                         | -                                    |
| DBP + 5 mmHg <sup>f</sup>                 | 1926     | -                                         | -                                    | 0.14 (-0.13, 0.40)                        | 0.60 (-0.03, 1.24)*                  |
| Censored regression <sup>g</sup>          | 1926     | 0.76 (0.26, 1.26)**                       | 1.24 (0.05, 2.44)**                  | 0.12 (-0.17, 0.42)                        | 0.65 (-0.05, 1.35)*                  |

<sup>a</sup>Per 5 dB(A) of traffic  $L_{\text{night}}$  and 10  $\mu\text{g}/\text{m}^3$  of  $\text{NO}_2$ . <sup>b</sup>All models adjusted for age, age squared, sex, education, Mediterranean diet, exercise, alcohol consumption, smoking, BMI, diabetes, deprivation, daily temperature, indoor railway  $L_{\text{night}}$ ,  $\text{NO}_2$ , and indoor traffic  $L_{\text{night}}$ . <sup>c</sup>Medicated means use of BP-lowering medication. <sup>d</sup>Model for the entire study sample, adjusted for variables in <sup>a</sup>, but not for BP-lowering medication. <sup>e</sup>Model for the entire study sample, adjusted for variables in <sup>a</sup> and for BP-lowering medication. <sup>f</sup>Addition of 10 mmHg to SBP or 5 mmHg to DBP levels if participant uses BP-lowering medication. <sup>g</sup>Model for the entire study sample. It assumes that had participants under BP-lowering medication not been treated, they would have BP levels.

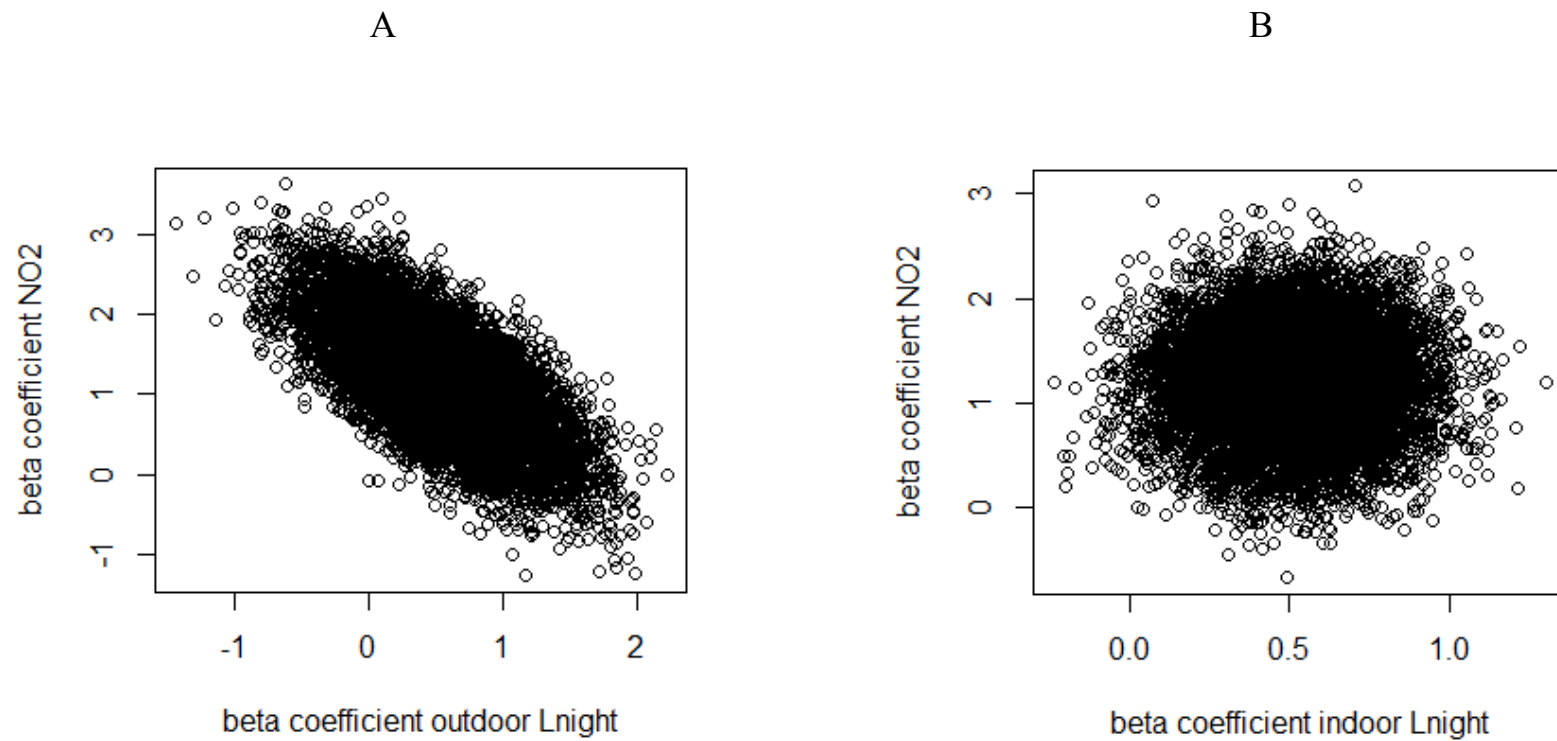

**Figure S1.** A: Correlation between beta coefficients of NO<sub>2</sub> and *outdoor* traffic L<sub>night</sub> from 10,000 simulated databases. B: Correlation between beta coefficients of NO<sub>2</sub> and *indoor* traffic L<sub>night</sub> from 10,000 simulated databases. Multi-exposure regression models for systolic blood pressure and L<sub>night</sub> and NO<sub>2</sub> adjusted for for: age, age squared, sex, education, Mediterranean diet, exercise, alcohol consumption, smoking, BMI, diabetes, deprivation, daily temperature (lag 0), BP-lowering medication, indoor railway L<sub>night</sub>.

### Hypertension

### Systolic blood pressure

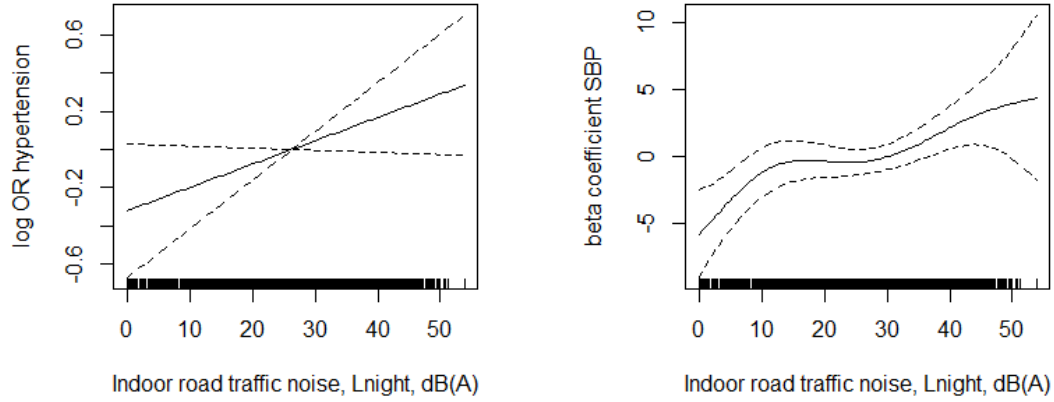

**Figure S2.** Smooth spline for the effect of 1 dB(A) increase in indoor road traffic  $L_{\text{night}}$  and 95% confidence intervals in a generalized additive model for hypertension (left) and systolic blood pressure (mmHg) (right). Model adjusted for: age, age squared, sex, education, Mediterranean diet, exercise, alcohol consumption, smoking, BMI, diabetes, deprivation, daily temperature (lag 0), BP-lowering medication, indoor railway  $L_{\text{night}}$ , and annual average  $\text{NO}_2$  ( $n = 1926$ ).
